# Supplementary material for: Development and Validation of the Pain and State of Health Inventory (PHI): Application for the Perioperative Setting
Source: J Clin Med. 2021 May 3;10(9):1965. doi: 10.3390/jcm10091965 (PMC8124984; doi:10.3390/jcm10091965)
Supplement: Supplementary file 1 [file jcm-10-01965-s001.zip › jcm-1160600-supplementary.pdf]

## II Emotional states

The next questions are about how you are feeling. For each statement, please mark the number that corresponds best to the intensity of emotional state.

You do not feel anxious at all

~~0~~ (1) (2) (3) (4) (5) (6) (7) (8) (9) (10)  
Not anxious at all Very anxious

You feel very anxious

(0) (1) (2) (3) (4) (5) (6) (7) (8) (9) ~~10~~  
Not anxious at all Very anxious

How do you feel the last days and today?

a) I feel **sad**:

(0) (1) (2) (3) (4) (5) (6) (7) (8) (9) (10)  
Not sad at all Very sad

b) I feel **anxious**:

(0) (1) (2) (3) (4) (5) (6) (7) (8) (9) (10)  
Not anxious at all Very anxious

c) I am **tired**:

(0) (1) (2) (3) (4) (5) (6) (7) (8) (9) (10)  
Not tired at all Very tired

d) I feel **numb**:

(0) (1) (2) (3) (4) (5) (6) (7) (8) (9) (10)  
Not numb at all Very numb

e) I feel **weak**:

(0) (1) (2) (3) (4) (5) (6) (7) (8) (9) (10)  
Not weak at all Very weak

f) I feel **irritated**:

(0) (1) (2) (3) (4) (5) (6) (7) (8) (9) (10)  
Not irritated at all Very irritated

g) My **mood** is overall:

(0) (1) (2) (3) (4) (5) (6) (7) (8) (9) (10)  
Good, without impairment Bad, severe impairment

### **III General state of health**

*For this question, please indicate how you would rate your overall health. Please mark the category that applies best to you.*

How are you? My general state of health is:

- |                  |                          |
|------------------|--------------------------|
| 1. Very good     | <input type="checkbox"/> |
| 2. Good          | <input type="checkbox"/> |
| 3. Rather good   | <input type="checkbox"/> |
| 4. Moderate      | <input type="checkbox"/> |
| 5. Rather bad    | <input type="checkbox"/> |
| 6. Bad           | <input type="checkbox"/> |
| 7. Very bad      | <input type="checkbox"/> |
| 8. I do not know | <input type="checkbox"/> |



## II Emotional states

The next questions are about how you are feeling. For each statement, please mark the degree that corresponds best to the intensity of emotional state.

You do not feel anxious at all

|                    |     |     |     |     |     |     |     |     |     |              |
|--------------------|-----|-----|-----|-----|-----|-----|-----|-----|-----|--------------|
| <del>X</del>       | (1) | (2) | (3) | (4) | (5) | (6) | (7) | (8) | (9) | (10)         |
| Not anxious at all |     |     |     |     |     |     |     |     |     | Very anxious |

You feel very anxious

|                    |     |     |     |     |     |     |     |     |     |              |
|--------------------|-----|-----|-----|-----|-----|-----|-----|-----|-----|--------------|
| (0)                | (1) | (2) | (3) | (4) | (5) | (6) | (7) | (8) | (9) | <del>X</del> |
| Not anxious at all |     |     |     |     |     |     |     |     |     | Very anxious |

How did you feel the last days and today?

a) I feel **sad**:

|                |     |     |     |     |     |     |     |     |     |          |
|----------------|-----|-----|-----|-----|-----|-----|-----|-----|-----|----------|
| (0)            | (1) | (2) | (3) | (4) | (5) | (6) | (7) | (8) | (9) | (10)     |
| Not sad at all |     |     |     |     |     |     |     |     |     | Very sad |

b) I feel **anxious**:

|                    |     |     |     |     |     |     |     |     |     |              |
|--------------------|-----|-----|-----|-----|-----|-----|-----|-----|-----|--------------|
| (0)                | (1) | (2) | (3) | (4) | (5) | (6) | (7) | (8) | (9) | (10)         |
| Not anxious at all |     |     |     |     |     |     |     |     |     | Very anxious |

c) I am **tired**:

|                  |     |     |     |     |     |     |     |     |     |            |
|------------------|-----|-----|-----|-----|-----|-----|-----|-----|-----|------------|
| (0)              | (1) | (2) | (3) | (4) | (5) | (6) | (7) | (8) | (9) | (10)       |
| Not tired at all |     |     |     |     |     |     |     |     |     | Very tired |

d) I feel **numb**:

|                 |     |     |     |     |     |     |     |     |     |           |
|-----------------|-----|-----|-----|-----|-----|-----|-----|-----|-----|-----------|
| (0)             | (1) | (2) | (3) | (4) | (5) | (6) | (7) | (8) | (9) | (10)      |
| Not numb at all |     |     |     |     |     |     |     |     |     | Very numb |

e) I feel **weak**:

|                 |     |     |     |     |     |     |     |     |     |           |
|-----------------|-----|-----|-----|-----|-----|-----|-----|-----|-----|-----------|
| (0)             | (1) | (2) | (3) | (4) | (5) | (6) | (7) | (8) | (9) | (10)      |
| Not weak at all |     |     |     |     |     |     |     |     |     | Very weak |

f) I feel **irritated**:

|                      |     |     |     |     |     |     |     |     |     |                |
|----------------------|-----|-----|-----|-----|-----|-----|-----|-----|-----|----------------|
| (0)                  | (1) | (2) | (3) | (4) | (5) | (6) | (7) | (8) | (9) | (10)           |
| Not irritated at all |     |     |     |     |     |     |     |     |     | Very irritated |

g) My **mood** is overall:

|                          |     |     |     |     |     |     |     |     |     |                        |
|--------------------------|-----|-----|-----|-----|-----|-----|-----|-----|-----|------------------------|
| (0)                      | (1) | (2) | (3) | (4) | (5) | (6) | (7) | (8) | (9) | (10)                   |
| Good, without impairment |     |     |     |     |     |     |     |     |     | Bad, severe impairment |

### **III General state of health**

*For this question, please indicate how you would rate your overall health. Please mark the category that applies best to you.*

How are you? My general state of health is:

- |                  |                          |
|------------------|--------------------------|
| 1. Very good     | <input type="checkbox"/> |
| 2. Good          | <input type="checkbox"/> |
| 3. Rather good   | <input type="checkbox"/> |
| 4. Moderate      | <input type="checkbox"/> |
| 5. Rather bad    | <input type="checkbox"/> |
| 6. Bad           | <input type="checkbox"/> |
| 7. Very bad      | <input type="checkbox"/> |
| 8. I do not know | <input type="checkbox"/> |

### **IV Somatic parameters**

#### **Mobility**

*Please indicate how much exercise you did today. Please mark the appropriate category.*

How much did you move today?

- |                                                            |                          |
|------------------------------------------------------------|--------------------------|
| 1. I was only in bed                                       | <input type="checkbox"/> |
| 2. I had physiotherapy in bed                              | <input type="checkbox"/> |
| 3. I sat down in bed                                       | <input type="checkbox"/> |
| 4. I went to the bathroom with help of others              | <input type="checkbox"/> |
| 5. I walked around with the help of physiotherapist/ nurse | <input type="checkbox"/> |
| 6. I went to the bathroom without help                     | <input type="checkbox"/> |
| 7. I walked around with the help of others (e.g. visitors) | <input type="checkbox"/> |
| 8. I walked around without help of others                  | <input type="checkbox"/> |

Do you think, you could have done more exercise?

- |                                                  |                          |
|--------------------------------------------------|--------------------------|
| Yes, I could have done more exercise             | <input type="checkbox"/> |
| I am content with my level of exercise           | <input type="checkbox"/> |
| No, I was overstrained with my level of exercise | <input type="checkbox"/> |

#### **Diet**

*Please indicate what you ate/drank today. Please mark the appropriate category.*

- |                                                   |                          |
|---------------------------------------------------|--------------------------|
| 1. No food/ drink                                 | <input type="checkbox"/> |
| 2. Limited tea/ water                             | <input type="checkbox"/> |
| 3. Unlimited tea/ water                           | <input type="checkbox"/> |
| 4. Soup/ yoghurt                                  | <input type="checkbox"/> |
| 5. Mashed food                                    | <input type="checkbox"/> |
| 6. Light to normal diet (including diabetic food) | <input type="checkbox"/> |

Do you think, you could have tolerated more/other nourishments?

- |                                                      |                          |
|------------------------------------------------------|--------------------------|
| Yes, I would have tolerated more/ other nourishments | <input type="checkbox"/> |
| I tolerated everything I ate/drunk                   | <input type="checkbox"/> |
| No, I did not tolerate the received nourishments     | <input type="checkbox"/> |

PHI — External assessment for nursing care, physiotherapists, and physicians

## Preoperatively

### Nursing Care

#### General state of health

*For this question, please indicate how you would rate the overall health of the patient. Please mark the category that applies best.*

How is the patient? The general state of health of the patient is:

- |                  |                          |
|------------------|--------------------------|
| 1. Very good     | <input type="checkbox"/> |
| 2. Good          | <input type="checkbox"/> |
| 3. Rather good   | <input type="checkbox"/> |
| 4. Moderate      | <input type="checkbox"/> |
| 5. Rather bad    | <input type="checkbox"/> |
| 6. Bad           | <input type="checkbox"/> |
| 7. Very bad      | <input type="checkbox"/> |
| 8. I do not know | <input type="checkbox"/> |

### Physician

Lung function: FEV<sub>1</sub> \_\_\_\_\_ FVC \_\_\_\_\_

Analgesics: No ☐ Yes ☐ Which? \_\_\_\_\_  
How much? \_\_\_\_\_

#### Health condition assessment:

*Please indicate how you would currently assess the patient's health condition generally.*

- |                                 |                          |
|---------------------------------|--------------------------|
| 1. Very good health condition   | <input type="checkbox"/> |
| 2. Good health condition        | <input type="checkbox"/> |
| 3. Rather good health condition | <input type="checkbox"/> |
| 4. Moderate health condition    | <input type="checkbox"/> |
| 5. Rather bad health condition  | <input type="checkbox"/> |
| 6. Bad health condition         | <input type="checkbox"/> |
| 7. Very bad health condition    | <input type="checkbox"/> |
| 8. I do not know                | <input type="checkbox"/> |

# Postoperatively

## Nursing Care

### General state of health

*For this question, please indicate how you would rate the overall health of the patient. Please mark the category that applies best.*

How is the patient? The general state of health of the patient is:

- |                  |                          |
|------------------|--------------------------|
| 1. Very good     | <input type="checkbox"/> |
| 2. Good          | <input type="checkbox"/> |
| 3. Rather good   | <input type="checkbox"/> |
| 4. Moderate      | <input type="checkbox"/> |
| 5. Rather bad    | <input type="checkbox"/> |
| 6. Bad           | <input type="checkbox"/> |
| 7. Very bad      | <input type="checkbox"/> |
| 8. I do not know | <input type="checkbox"/> |

### Somatic parameters

*For this question, please indicate what the patient ate/drank today. Please mark the appropriate category.*

- |                                                   |                          |
|---------------------------------------------------|--------------------------|
| 1. No food/ drink                                 | <input type="checkbox"/> |
| 2. Limited tea/ water                             | <input type="checkbox"/> |
| 3. Unlimited tea/ water                           | <input type="checkbox"/> |
| 4. Soup/ yoghurt                                  | <input type="checkbox"/> |
| 5. Mashed food                                    | <input type="checkbox"/> |
| 6. Light to normal diet (including diabetic food) | <input type="checkbox"/> |

## Physiotherapists

### Somatic parameters

*Please indicate how much exercise the patient did today. Please mark the appropriate category.*

How much did the move today?

- |                                                               |                          |
|---------------------------------------------------------------|--------------------------|
| 1. S/he was only in bed                                       | <input type="checkbox"/> |
| 2. S/he had physiotherapy in bed                              | <input type="checkbox"/> |
| 3. S/he sat down in bed                                       | <input type="checkbox"/> |
| 4. S/he went to the bathroom with help of others              | <input type="checkbox"/> |
| 5. S/he walked around with the help of physiotherapist/ nurse | <input type="checkbox"/> |
| 6. S/he went to the bathroom without help                     | <input type="checkbox"/> |
| 7. S/he walked around with the help of others (e.g. visitors) | <input type="checkbox"/> |
| 8. S/he walked around without help of others                  | <input type="checkbox"/> |

## Physician

**Lung function:** FEV<sub>1</sub> \_\_\_\_\_ FVC \_\_\_\_\_

**Analgesics:** No ☐ Yes ☐ Which? \_\_\_\_\_

How much? \_\_\_\_\_

**Received PCA:** No ☐ Yes ☐ How much? \_\_\_\_\_

### **Status evaluation:**

*Please indicate how you would currently assess the patient's health condition generally.*

- |                                 |                          |
|---------------------------------|--------------------------|
| 1. Very good health condition   | <input type="checkbox"/> |
| 2. Good health condition        | <input type="checkbox"/> |
| 3. Rather good health condition | <input type="checkbox"/> |
| 4. Moderate health condition    | <input type="checkbox"/> |
| 5. Rather bad health condition  | <input type="checkbox"/> |
| 6. Bad health condition         | <input type="checkbox"/> |
| 7. Very bad health condition    | <input type="checkbox"/> |
| 8. I do not know                | <input type="checkbox"/> |
